# Supplementary material
Source: PubMed Central journal article supplement (PMC10015056)

**Supplemental Table 1.** List of studies used in Figures with links to the MPS-Db.

| Figure  | Study Name in the MPS-Database                                                                                                                                                                                                                                                                                                                                                                                                                                                   | URLs                                                                                                                                                                                                                                                                                                                                                                                                                                                                                                                                                                                                                                                                                                                |
|---------|----------------------------------------------------------------------------------------------------------------------------------------------------------------------------------------------------------------------------------------------------------------------------------------------------------------------------------------------------------------------------------------------------------------------------------------------------------------------------------|---------------------------------------------------------------------------------------------------------------------------------------------------------------------------------------------------------------------------------------------------------------------------------------------------------------------------------------------------------------------------------------------------------------------------------------------------------------------------------------------------------------------------------------------------------------------------------------------------------------------------------------------------------------------------------------------------------------------|
| 1 and 2 | <p>Liver_Mimetas 2-lane_Exp.7_PHH (TF HU8373) pre-differentiated in spheroid plate</p> <p>Liver_Mimetas 2-lane_Exp.8_iHep ± NPCs with Midazolam</p> <p>Liver_Mimetas 2-lane_Exp.9_PHH (TF HU8373) ± NPCs with Midazolam</p>                                                                                                                                                                                                                                                      | <p><a href="https://mps.csb.pitt.edu/assays/assaystudy/698/">https://mps.csb.pitt.edu/assays/assaystudy/698/</a><br/> <a href="https://mps.csb.pitt.edu/assays/assaystudy/681/">https://mps.csb.pitt.edu/assays/assaystudy/681/</a><br/> <a href="https://mps.csb.pitt.edu/assays/assaystudy/696/">https://mps.csb.pitt.edu/assays/assaystudy/696/</a></p>                                                                                                                                                                                                                                                                                                                                                          |
| 3       | <p>Exp.1; Liver_Mimetas 2-lane_Exp.1_iHep and NPCs with Troglitazone</p> <p>Exp.2; Liver_Mimetas 2-lane_Exp.11_iHep and NPCs with Trovafloxacin ± LPS</p> <p>Exp.3; Liver_Mimetas 2-lane_Exp.3_iHep and NPCs (Transporters)</p> <p>Exp.4; Liver_Mimetas 2-lane_Exp.4_iHep and NPCs with Five Chemical Cocktail_2nd</p> <p>Exp.5; Liver_Mimetas 2-lane_Exp.6_iHep ± NPCs with Five Chemical Cocktail</p> <p>Exp.6; Liver_Mimetas 2-lane_Exp.12_iHep ± NPCs with Midazolam_2nd</p> | <p><a href="https://mps.csb.pitt.edu/assays/assaystudy/566/">https://mps.csb.pitt.edu/assays/assaystudy/566/</a><br/> <a href="https://mps.csb.pitt.edu/assays/assaystudy/699/">https://mps.csb.pitt.edu/assays/assaystudy/699/</a><br/> <a href="https://mps.csb.pitt.edu/assays/assaystudy/582/">https://mps.csb.pitt.edu/assays/assaystudy/582/</a><br/> <a href="https://mps.csb.pitt.edu/assays/assaystudy/588/">https://mps.csb.pitt.edu/assays/assaystudy/588/</a><br/> <a href="https://mps.csb.pitt.edu/assays/assaystudy/680/">https://mps.csb.pitt.edu/assays/assaystudy/680/</a><br/> <a href="https://mps.csb.pitt.edu/assays/assaystudy/727/">https://mps.csb.pitt.edu/assays/assaystudy/727/</a></p> |
| 4       | <p>Liver_Mimetas 2-lane_Exp.4_iHep and NPCs with Five Chemical Cocktail_2nd</p> <p>Liver_Mimetas 2-lane_Exp.8_iHep ± NPCs with Midazolam</p>                                                                                                                                                                                                                                                                                                                                     | <p><a href="https://mps.csb.pitt.edu/assays/assaystudy/588/">https://mps.csb.pitt.edu/assays/assaystudy/588/</a><br/> <a href="https://mps.csb.pitt.edu/assays/assaystudy/681/">https://mps.csb.pitt.edu/assays/assaystudy/681/</a></p>                                                                                                                                                                                                                                                                                                                                                                                                                                                                             |
| 5       | Liver_Mimetas 2-lane_Exp.1_iHep and NPCs with Troglitazone                                                                                                                                                                                                                                                                                                                                                                                                                       | <a href="https://mps.csb.pitt.edu/assays/assaystudy/566/">https://mps.csb.pitt.edu/assays/assaystudy/566/</a>                                                                                                                                                                                                                                                                                                                                                                                                                                                                                                                                                                                                       |
| 6       | Liver_Mimetas 2-lane_Exp.13_iHep and NPCs with Trovafloxacin ± LPS_2nd                                                                                                                                                                                                                                                                                                                                                                                                           | <a href="https://mps.csb.pitt.edu/assays/assaystudy/759/">https://mps.csb.pitt.edu/assays/assaystudy/759/</a>                                                                                                                                                                                                                                                                                                                                                                                                                                                                                                                                                                                                       |

**Supplemental Table 2.** Loading success rate of iHeps/collagen I and HMEC1/THP1.

| iHep all                   |                            | Exp.0 (Mps-<br>Db Exp. 8) | Exp.1 (Mps-<br>Db Exp.1) | Exp.2 (Mps-<br>Db Exp. 11) | Exp.3 (Mps-<br>Db Exp. 3) | Exp.4 (Mps-<br>Db Exp. 4) | Exp.5 (Mps-<br>Db Exp. 6) | Exp.6 (Mps-<br>Db Exp. 12) | Total | Success rate |
|----------------------------|----------------------------|---------------------------|--------------------------|----------------------------|---------------------------|---------------------------|---------------------------|----------------------------|-------|--------------|
| 2.5 uL<br>iHeps/collagen I | Total No. of<br>chips      | 88                        | 73                       | 88                         | 96                        | 88                        | 92                        | 76                         | 601   | 95.5%        |
|                            | Successful<br>No. of chips | 84                        | 71                       | 88                         | 95                        | 88                        | 84                        | 64                         | 574   |              |
| 2.5 uL<br>HMEC1/THP1       | Total No. of<br>chips      | 44                        | 73                       | 88                         | 96                        | 88                        | 44                        | 40                         | 473   | 96.8%        |
|                            | Successful<br>No. of chips | 44                        | 70                       | 86                         | 90                        | 88                        | 42                        | 38                         | 458   |              |

| iHep+NPCs                  |                            | Exp.0 (Mps-<br>Db Exp. 8) | Exp.1 (Mps-<br>Db Exp.1) | Exp.2 (Mps-<br>Db Exp. 11) | Exp.3 (Mps-<br>Db Exp. 3) | Exp.4 (Mps-<br>Db Exp. 4) | Exp.5 (Mps-<br>Db Exp. 6) | Exp.6 (Mps-<br>Db Exp. 12) | Total | Success rate |
|----------------------------|----------------------------|---------------------------|--------------------------|----------------------------|---------------------------|---------------------------|---------------------------|----------------------------|-------|--------------|
| 2.5 uL<br>iHeps/collagen I | Total No. of<br>chips      | 48                        | 73                       | 88                         | 96                        | 88                        | 40                        | 40                         | 473   | 97.9%        |
|                            | Successful<br>No. of chips | 44                        | 71                       | 88                         | 95                        | 88                        | 39                        | 38                         | 463   |              |
| 2.5 uL<br>HMEC1/THP1       | Total No. of<br>chips      | 48                        | 73                       | 88                         | 96                        | 88                        | 40                        | 40                         | 473   | 97.0%        |
|                            | Successful<br>No. of chips | 48                        | 70                       | 86                         | 90                        | 88                        | 39                        | 38                         | 459   |              |

**Supplemental Table 3.** Trend and variability of each phenotype in OrganoPlate® 2-lane 96 plates seeded with iHeps and non-parenchymal cells.

| Endpoints                        | No. of chips | Mean | Min. | Max.  | 95%CI     |
|----------------------------------|--------------|------|------|-------|-----------|
| <b>% Live cells</b>              |              |      |      |       |           |
| Day 10                           | 18           | 80.3 | 64.6 | 92.1  | 74.5-86.2 |
| Day 15                           | 16           | 78.5 | 64.2 | 87.5  | 74.5-82.4 |
| Day 17                           | 19           | 73.8 | 49.6 | 89.6  | 66.8-80.7 |
| <b>LDH (mU/mL/day)</b>           |              |      |      |       |           |
| Day 1-3                          | 29           | 5.8  | 1.5  | 12.8  | 3.8-7.8   |
| Day 4-6                          | 30           | 3.4  | 0.8  | 9.2   | 1.9-4.8   |
| Day 7-9                          | 27           | 2.2  | 0.5  | 7.3   | 1.0-3.5   |
| Day 10-13                        | 27           | 2.4  | 0.4  | 4.7   | 1.5-3.3   |
| Day 14-17                        | 19           | 9.7  | 2.3  | 28.6  | 5.0-14.3  |
| <b>Albumin (µg/day/1M Hep.)</b>  |              |      |      |       |           |
| Day 1-3                          | 29           | 4.4  | 1.3  | 12.3  | 2.5-6.3   |
| Day 4-6                          | 30           | 16.6 | 3.2  | 53.1  | 7.6-25.7  |
| Day 7-9                          | 31           | 18.5 | 3.8  | 53.1  | 9.5-27.5  |
| Day 10-13                        | 31           | 18.9 | 3.5  | 55.6  | 10.3-27.5 |
| Day 14-17                        | 19           | 14.2 | 2.3  | 47.8  | 5.1-23.3  |
| <b>Urea (µg/day/1M Hep.)</b>     |              |      |      |       |           |
| Day 1-3                          | 22           | 11.1 | 0.1  | 30.3  | 5.5-16.6  |
| Day 4-6                          | 30           | 17.2 | 1.8  | 47.3  | 8.8-25.6  |
| Day 7-9                          | 31           | 22.2 | 3.0  | 100.7 | 7.5-36.8  |
| Day 10-13                        | 31           | 36.4 | 4.9  | 141.3 | 16.6-52.3 |
| Day 14-17                        | 19           | 48.2 | 7.3  | 170.4 | 16.5-80.0 |
| <b>CYP3A4 (pmol/min/1M Hep.)</b> |              |      |      |       |           |
| Day 4-6                          | 19           | 0.19 | 0.11 | 0.31  | 0.15-0.22 |
| Day 7-9                          | 27           | 0.28 | 0.09 | 0.88  | 0.15-0.41 |
| Day 10-13                        | 25           | 0.35 | 0.16 | 0.73  | 0.27-0.43 |
| Day 14-17                        | 19           | 0.37 | 0.08 | 0.64  | 0.28-0.46 |

**Supplemental Table 4.** Coefficient of variation and its trend of each phenotype in OrganoPlate® 2-lane 96 plates seeded with iHeps and non-parenchymal cells.

| Endpoints           | Exp.1<br>(Mps-Db<br>Exp.1) | Exp.2<br>(Mps-Db<br>Exp. 11) | Exp.3<br>(Mps-Db<br>Exp. 3) | Exp.4<br>(Mps-Db<br>Exp. 4) | Exp.5<br>(Mps-Db<br>Exp. 6) | Exp.6<br>(Mps-Db<br>Exp. 12) |
|---------------------|----------------------------|------------------------------|-----------------------------|-----------------------------|-----------------------------|------------------------------|
| <b>% Live cells</b> |                            |                              |                             |                             |                             |                              |
| Day 10              | 8%                         | 12%                          | -                           | -                           | -                           | -                            |
| Day 15              | -                          | -                            | 7%                          | -                           | -                           | -                            |
| Day 17              | -                          | -                            | -                           | 6%                          | 12%                         | 4%                           |
| <b>LDH</b>          |                            |                              |                             |                             |                             |                              |
| Day 1-3             | 39%                        | 20%                          | 27%                         | 26%                         | 14%                         | 25%                          |
| Day 4-6             | 32%                        | 9%                           | 31%                         | 42%                         | 16%                         | 10%                          |
| Day 7-9             | 34%                        | 19%                          | 46%                         | 18%                         | 17%                         | 26%                          |
| Day 10-13           | 28%                        | 8%                           | 41%                         | 11%                         | 17%                         | 22%                          |
| Day 14-17           |                            |                              | 17%                         | 66%                         | 26%                         | 9%                           |
| <b>Albumin</b>      |                            |                              |                             |                             |                             |                              |
| Day 1-3             | 33%                        | 13%                          | 25%                         | 39%                         | 35%                         | 50%                          |
| Day 4-6             | 34%                        | 2%                           | 21%                         | 70%                         | 22%                         | 29%                          |
| Day 7-9             | 56%                        | 34%                          | 23%                         | 44%                         | 24%                         | 52%                          |
| Day 10-13           | 46%                        | 29%                          | 22%                         | 32%                         | 26%                         | 47%                          |
| Day 14-17           |                            |                              | 12%                         | 37%                         | 18%                         | 38%                          |
| <b>Urea</b>         |                            |                              |                             |                             |                             |                              |
| Day 1-3             | 66%                        | 13%                          | 95%                         | 20%                         | 15%                         | 49%                          |
| Day 4-6             | 25%                        | 46%                          | 62%                         | 47%                         | 20%                         | 40%                          |
| Day 7-9             | 20%                        | 27%                          | 60%                         | 47%                         | 20%                         | 43%                          |
| Day 10-13           | 25%                        | 25%                          | 43%                         | 40%                         | 19%                         | 47%                          |
| Day 14-17           |                            |                              | 51%                         | 28%                         | 15%                         | 43%                          |
| <b>CYP3A4</b>       |                            |                              |                             |                             |                             |                              |
| Day 4-6             | -                          | -                            | -                           | 21%                         | 25%                         | 23%                          |
| Day 7-9             | 32%                        | 32%                          | -                           | 16%                         | 21%                         | 26%                          |
| Day 10-13           | 36%                        | 15%                          | -                           | 24%                         | 29%                         | 12%                          |
| Day 14-17           | -                          | -                            | -                           | 23%                         | 26%                         | 35%                          |

**Supplemental Figure 1.** Basic characteristics (top) and plated morphology (bottom) of 4 lots of primary human hepatocytes from different suppliers (Lonza and ThermoFisher) that were considered for these experiments. Lot HU8373 was selected for subsequent studies.

| Supplier     | Lot #     | Avail. Qty | Sex | Race      | Age (yrs) | BMI  | Alcohol Use | Tobacco Use | Drug Use | ALT | AST | Viability (%) | Verified for 96-well plating | Induction Fold mRNA CYP3A4 | Induction Fold CYP3A4 |
|--------------|-----------|------------|-----|-----------|-----------|------|-------------|-------------|----------|-----|-----|---------------|------------------------------|----------------------------|-----------------------|
| Lonza        | HUM182531 | 782        | F   | Caucasian | 51        | 25.7 | Social      | No          | No       | 20  | 22  | 80            | Yes                          | 76.8                       | 122                   |
| Lonza        | HUM183231 | 668        | F   | Caucasian | 50        | 28.8 | Social      | No          | No       | 29  | 31  | 84            | Yes                          | 111.7                      | 9                     |
| ThermoFisher | HU8300    | 227        | M   | Caucasian | 31        | 21   | Yes         | Yes         | Yes      | -   | -   | 94            | Yes                          | 24.6                       | 21.1                  |
| ThermoFisher | HU8373    | 813        | F   | Caucasian | 26        | 18.6 | Yes         | Yes         | Yes      | -   | -   | 93            | Yes                          | 33.14                      | 34.6                  |

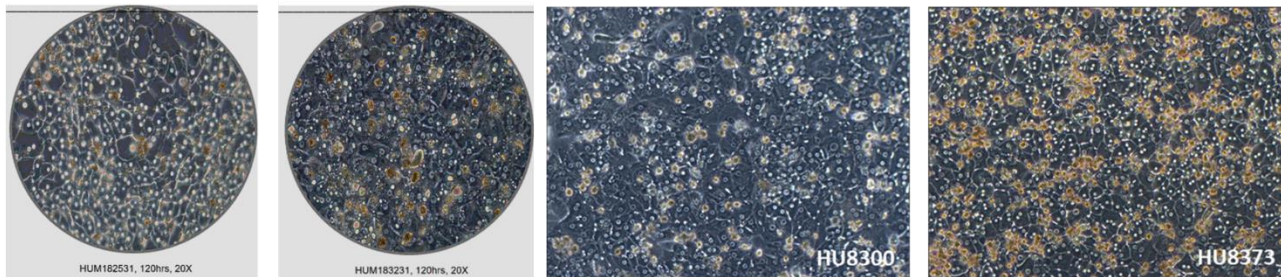

**Supplemental Figure 2.** Comparison of basic function (LDH, albumin, urea, and CYP3A4 activity) of in traditional 2D cultures of 4 lots of primary human hepatocytes from different suppliers (Lonza and ThermoFisher) that were considered for these experiments. Data are plotted as mean  $\pm$  standard deviation (n = 3-4). Each lot is marked as shown in the insets.

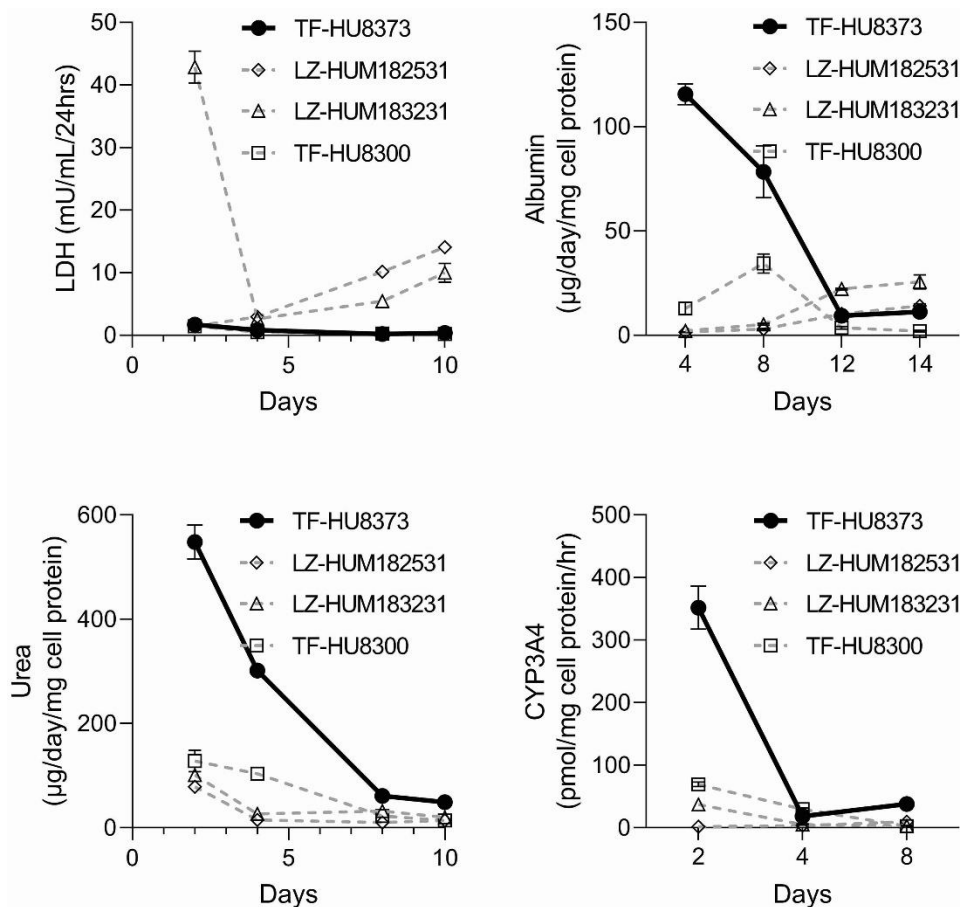

**Supplemental Figure 3.** Comparison of hepatotoxicity screening utility between OrganoPlate® 2-lane 96 plate seeded with iHeps and non-parenchymal cells and traditional 2D culture models, as reported in (Bircsak et al., 2021).

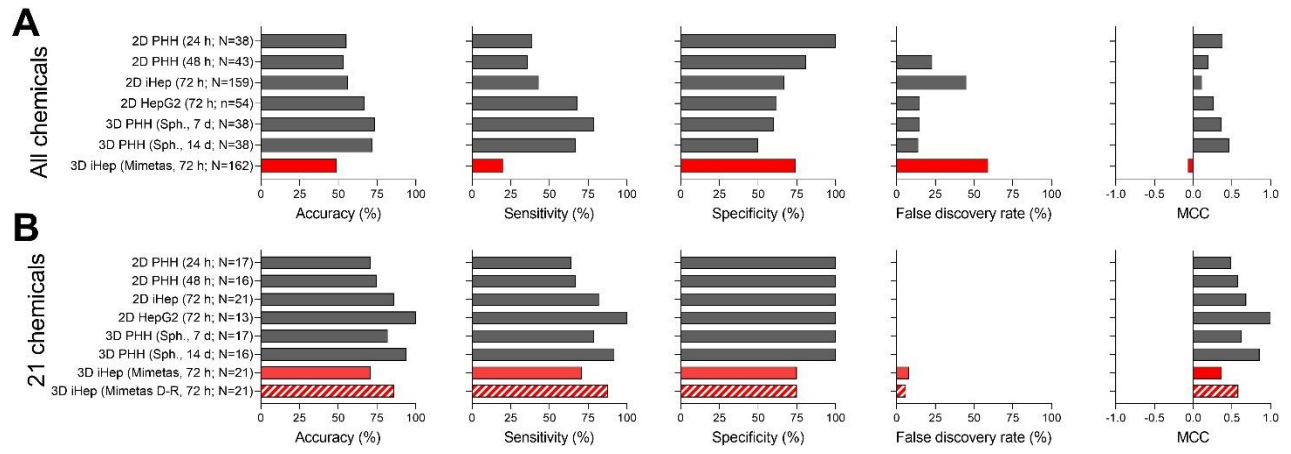

Supplement: NIHMS1881443-supplement-1.pdf [file NIHMS1881443-supplement-1.pdf]
